# Supplementary material for: Transcription factor Znf2 coordinates with the chromatin remodeling SWI/SNF complex to regulate cryptococcal cellular differentiation
Source: PubMed Central journal article supplement (PMC6856107; doi:10.1038/s42003-019-0665-2), 2019-11-14
Supplement: 42003_2019_665_MOESM1_ESM.pdf [file 42003_2019_665_MOESM1_ESM.pdf]

## Transcription factor *Znf2* coordinates with the chromatin remodeling SWI/SNF complex to regulate cryptococcal cellular differentiation

Lin *et.al.*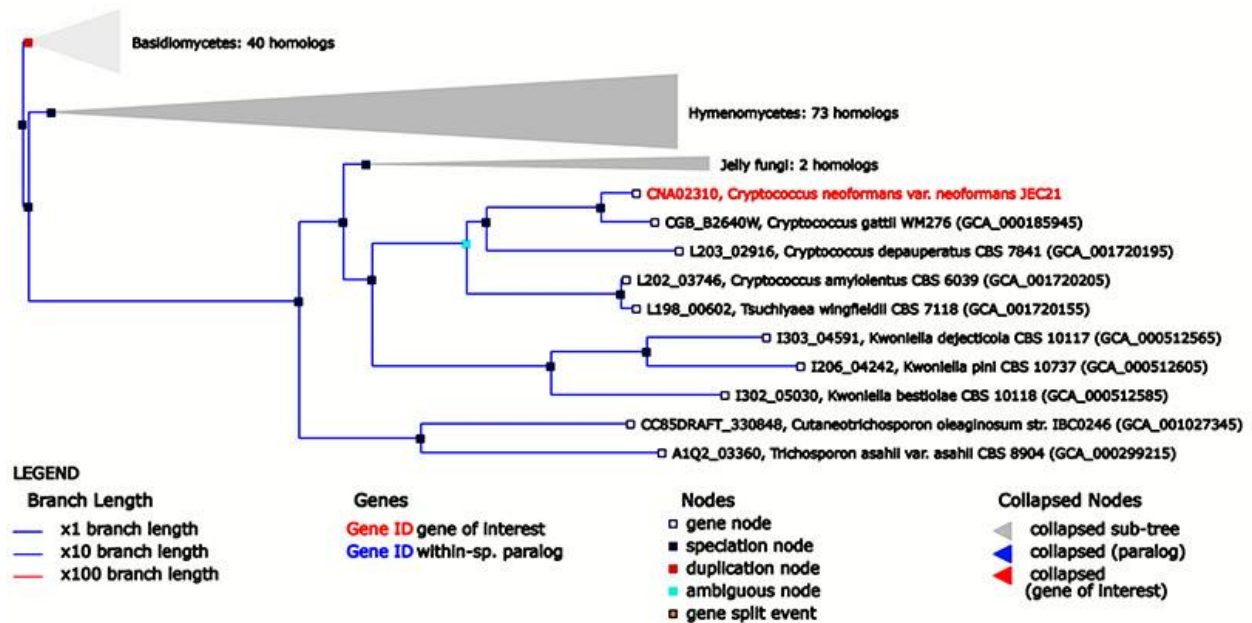

**Supplementary Fig. 1. A *BRF1* gene tree.** The gene tree was constructed on EnsemblFungi with the *BRF1* gene (gene ID *CNA02310*) as input. The gene tree was generated by the Gene Orthology/Paralogy prediction method pipeline where the maximum likelihood phylogenetic gene trees (generated by TreeBeST<sup>5</sup>) play a central role.

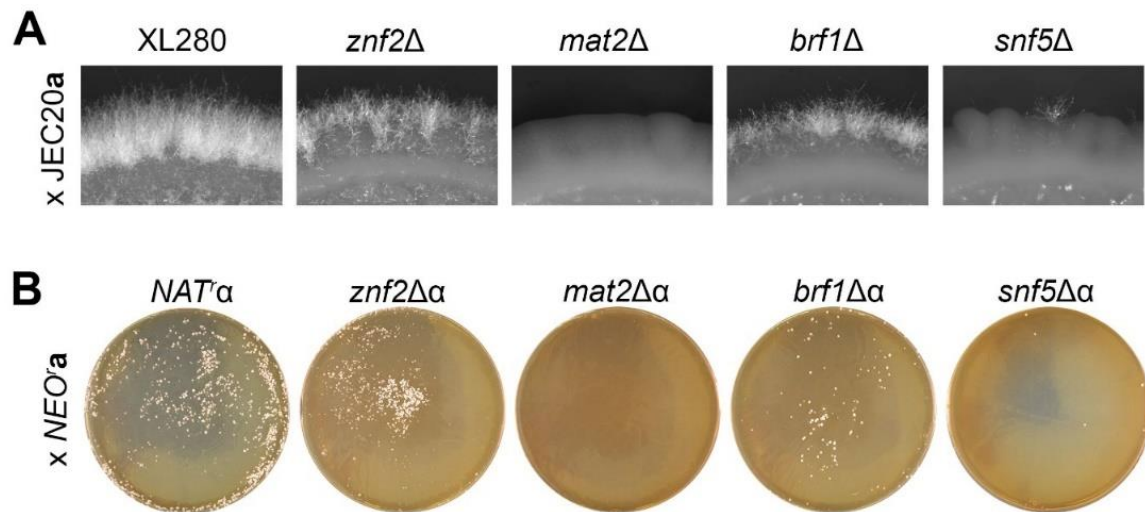

**Supplementary Fig. 2. The *brf1Δ* and *snf5Δ* strains are defective in cell fusion.** **a.** WT, *znf2Δ*, *mat2Δ*, *brf1Δ*, and *snf5Δ*  $\alpha$  strains were crossed to the wild type JEC20a reference strain on V8 medium at 22°C in dark for 4 days. JEC20a is non-filamentous by itself on V8 medium. **b.** The  $\alpha$  strains including the control XL1319, *znf2Δ*, *mat2Δ*, *brf1Δ*, and *snf5Δ* mutants with NAT<sup>R</sup> were crossed with the mating type **a** strain YSB133 with G418<sup>R</sup>. After 24 hours, the co-cultures were collected, and fusion products were selected on media supplemented with NAT and G418 drugs.

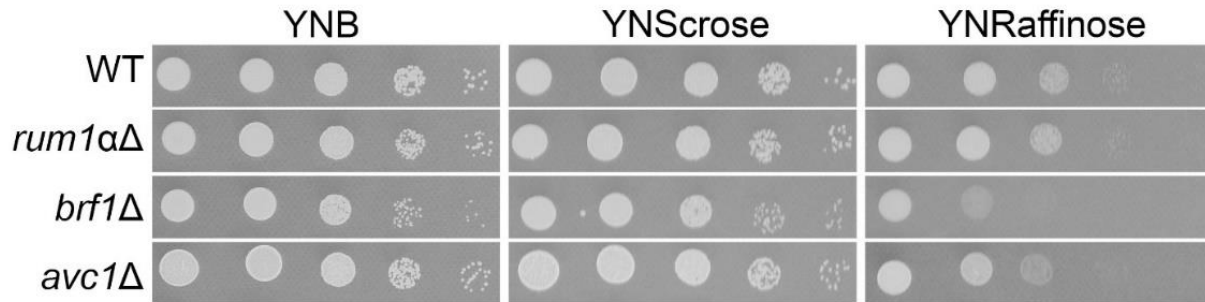

**Supplementary Fig. 3. *BRF1* is the only ARID containing gene involved in growth on raffinose medium.** The ARID containing gene deletion mutants *rum1αΔ*, *avc1Δ* and *brf1Δ* along with the WT XL280 were serial diluted and spotted onto YNB, YNSucose, and YNRaffinose media and cultured at 30°C for 1 day.

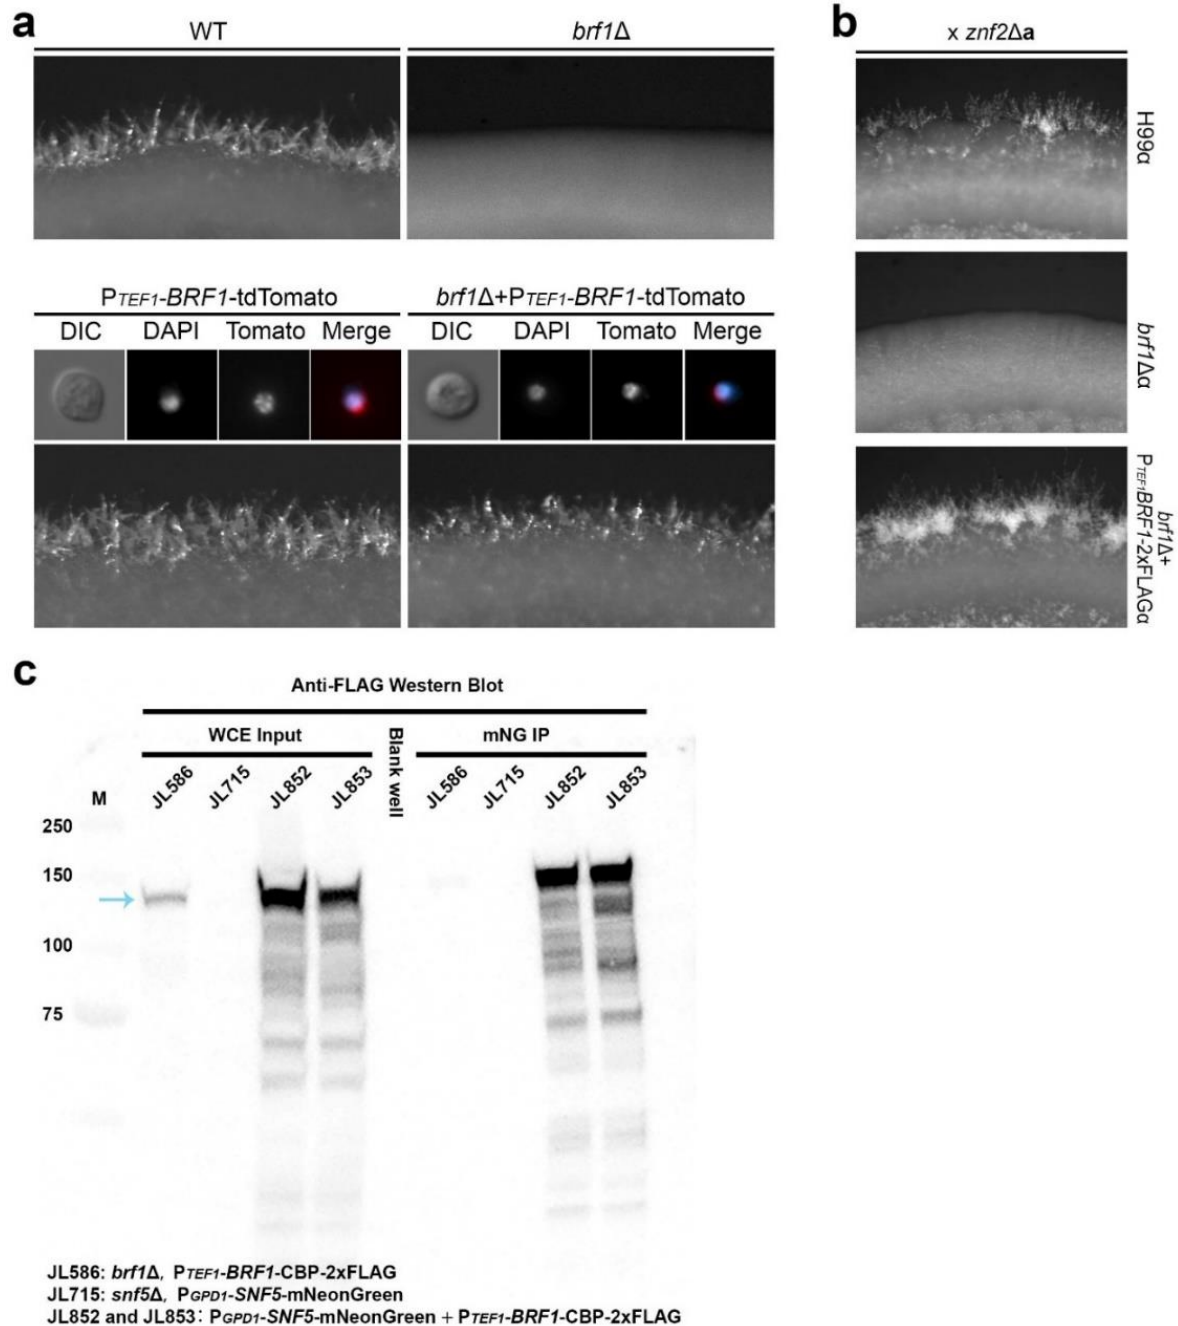

**Supplementary Fig. 4. The *BRF1* overexpression restored the defects in *brf1Δ*.** **a.** WT, *brf1Δ*, *brf1Δ+P<sub>TEF1</sub>-BRF1-tdTomato* strains was cultured on V8 medium for 2 days. The fluorescence images were from the *P<sub>TEF1</sub>-BRF1-tdTomato* cells cultured overnight in YPD liquid. **b.** WT H99, *brf1Δ* (JL131, MAT $\alpha$ ), and *brf1Δ+P<sub>TEF1</sub>-BRF1-CBP-2xFLAG* strains were crossed with a *znf2Δ* strain (strain XT110, MAT $\alpha$ ). The crosses were cultured on V8 medium for 3 days. **c.** Anti-FLAG Co-IP western of samples from JL586, JL715, JL852 and JL853. The IP samples (mNG IP, right) were elutes of the whole cell extract (WCE, left) incubated with mNeonGreen-Trap beads.

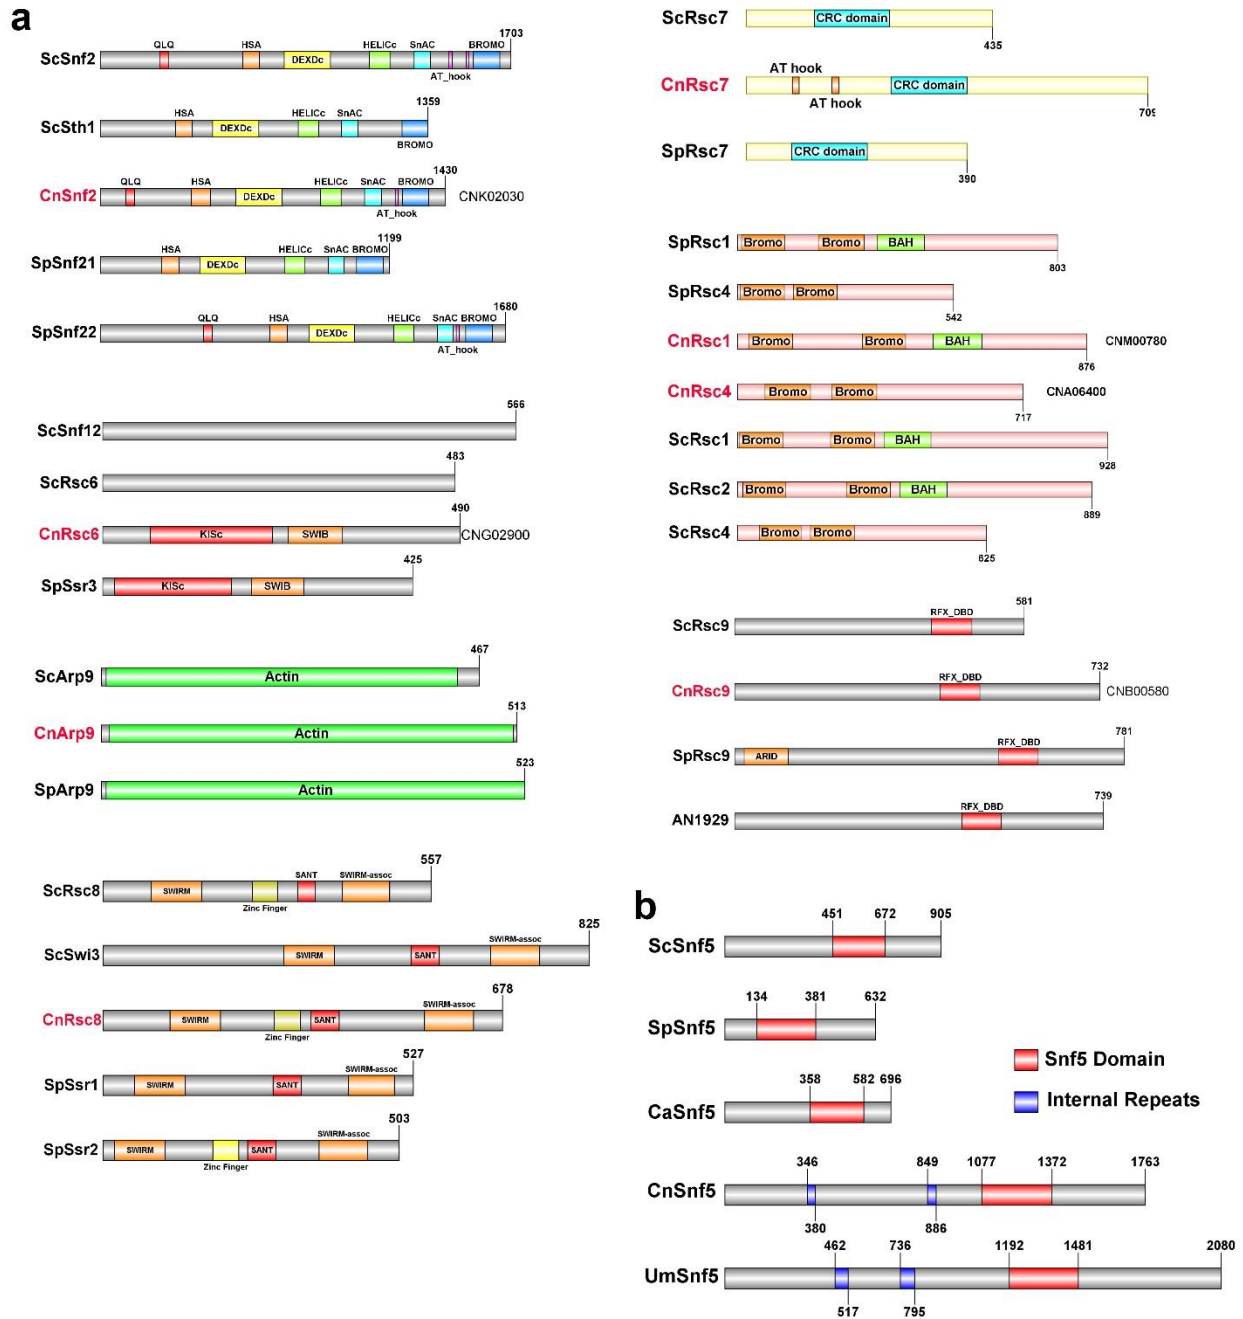

**Supplementary Fig. 5.** Diagrams of domain layout of the subunits in the SWI/SNF and RSC complex in *C. neoformans*. **a.** The domain layouts for Snf2, Rsc6, Arp9, Rsc8, Rsc7, Rsc1, Rsc4 and Rsc9 subunits in the RSC complex in *C. neoformans*, together with their homologs in *S. cerevisiae* and *S. pombe*. **b.** The domain layouts for Snf5 proteins in ascomycetes (*S. cerevisiae*, *S. pombe*, and *C. albicans*) and basidiomycetes (*C. neoformans* and *Ustilago maydis*).

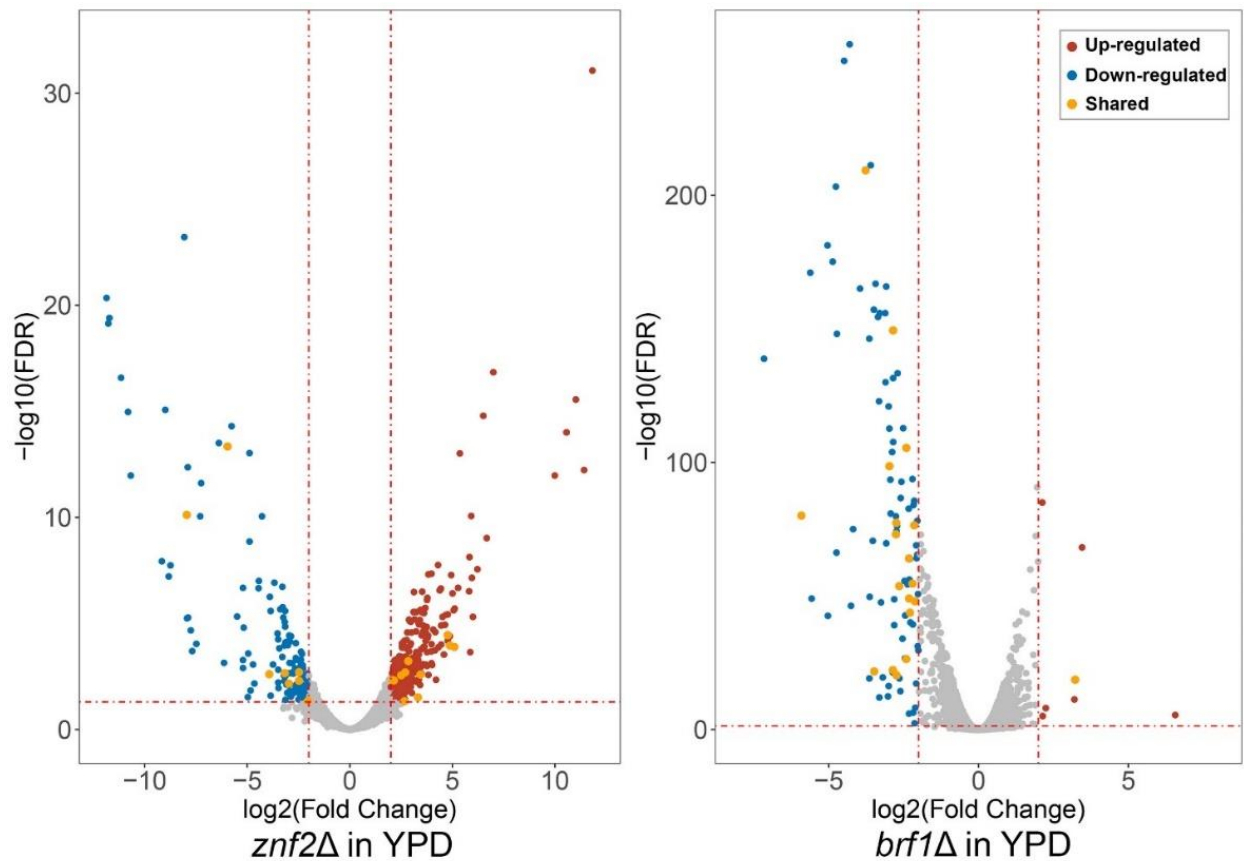

**Supplementary Fig. 6.** Volcano plots of fold changes in the gene transcript level in the *znf2Δ* mutant (left panel) and the *brf1Δ* mutant (right panel) compared to the wild type cultured in YPD medium for 24 hours. Each dot in the plot indicates a protein-coding gene. The vertical dash lines indicate the  $|\log_2^{FC}|=2$  and the horizontal dash line shows the  $FDR=0.05$ . The differentially up-regulated genes are colored red and the differentially down-regulated genes are colored blue. The shared DEG between *znf2Δ* and *brf1Δ* mutants are colored in orange.

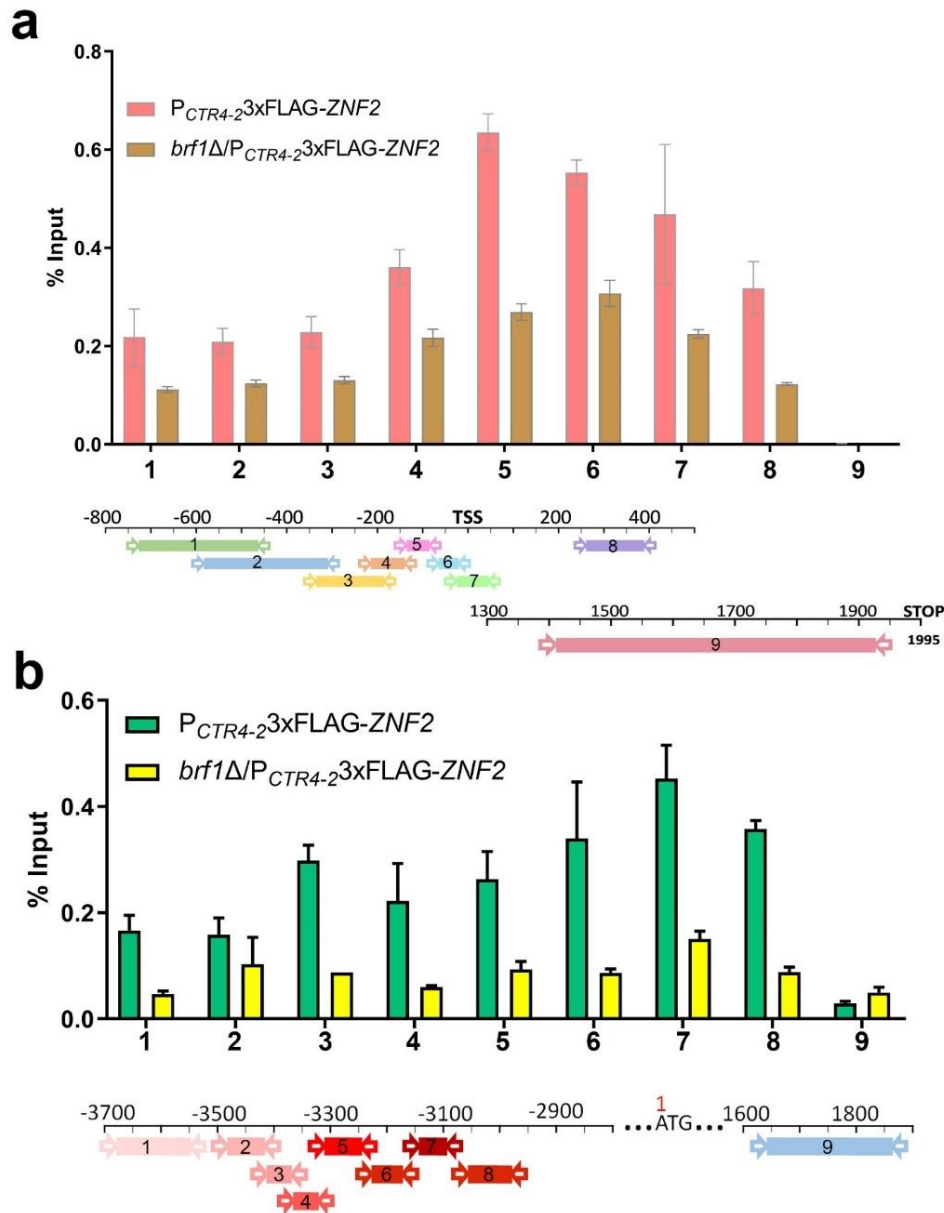

**Supplementary Fig. 7.** Znf2 binds to the promoter of *ZNF2* and *CFL1*. The %input bar graph indicates the relative abundance of DNA fragments of selected regions recovered from FLAG tagged Znf2 in the presence or absence of *BRF1*. The standard derivation error bars represent the data from two technical replicates of each biological duplicate. **a.** Primer pairs (from 1 to 8) spanned the promoter region of *CFL1*, and primer pair 9 covered the open reading frame and served as a control. The primer positions are relative to the transcription start site (TSS). **b.** Primer pairs (from 1 to 8) spanned the promoter region of *ZNF2*, and primer pair 9 covered the open reading frame and served as a control. The transcription start site of *ZNF2* gene is poorly defined. The primer positions are therefore relative to the translation start ATG site.

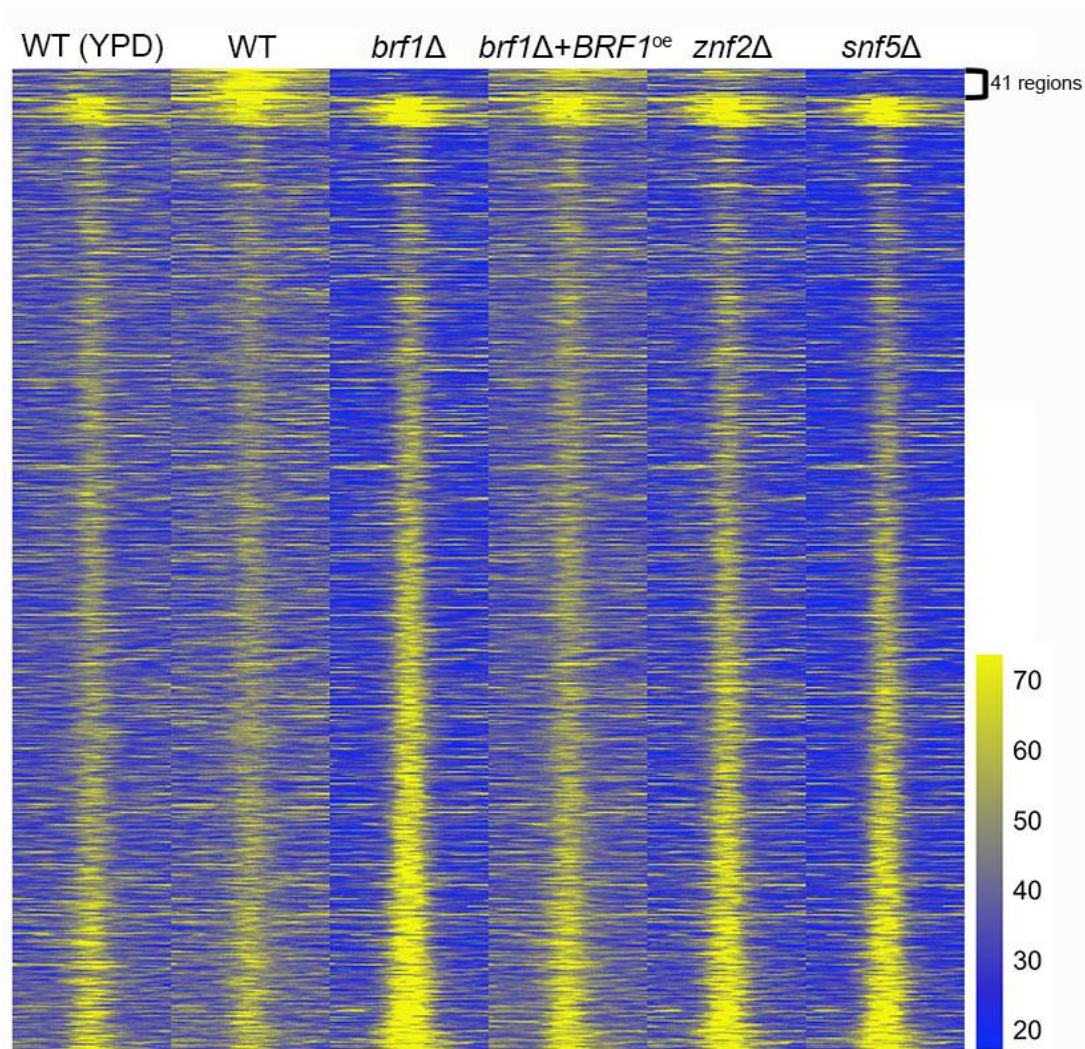

**Supplementary Fig. 8.** Heatmap of the *brf1Δ* differential peaks in WT, *brf1Δ*, *brf1Δ+BRF1<sup>oe</sup>*, *znf2Δ*, and *snf5Δ* strains. Total of 1312 differential peaks were called by MACS2 using a q-value of 0.01, extension size of 73, and shifting reads by 37 bp to center on the insertion site in the *brf1Δ* compared to WT strain on V8 media. 41 of the regions of chromatin accessibility were reduced while the rest were enhanced. The chromatin accessibility of WT, *brf1Δ*, *brf1Δ+BRF1<sup>oe</sup>*, *znf2Δ*, and *snf5Δ* strains were all mapped against the 1312 the *brf1Δ* differential peaks.



**Supplementary Table 1. related to Fig.1.** The list of insertion sites from the eight linked insertional mutants.

| <b>Type of Insertion</b> | <b>Insertion Site in the Genome</b>           | <b>Potential Affected Gene(s)</b> |
|--------------------------|-----------------------------------------------|-----------------------------------|
| Paired                   | 169nt downstream of TSS                       | CNA02310                          |
| Paired                   | 656nt downstream of TSS                       | CNA02310                          |
| Paired                   | 2566nt downstream of TSS                      | CNA07190                          |
| Paired                   | 126nt downstream of TSS                       | CNA07190                          |
| Paired                   | 3068nt downstream of TSS                      | CND05760                          |
| Paired                   | 1248nt downstream of TSS                      | CNK02410                          |
| Singleton                | At intergenic region of CNA07150 and CNA07160 | CNA07150 CNA07160                 |
| Singleton                | At intergenic region of CNA07230 and CNA07240 | CNA07230 CNA07240                 |

**Supplementary Table 2. Related to Table 1 and Fig.3.** The list of proteins identified from Co-IP/MS by Sfh1-mNeonGreen as bait.

| Coding Locus(D) | Coding Locus(A)   | Protein name            | # peptide spectrum matches |
|-----------------|-------------------|-------------------------|----------------------------|
| CNA03310        | CNAG_00372        | Rsc7 <sup>c</sup>       | 56                         |
| CNE04020        | CNAG_02134        | Rsc8 <sup>b</sup>       | 54                         |
| CNK02030        | CNAG_01863        | Snf2 <sup>b</sup>       | 50                         |
| <b>CNC06140</b> | <b>CNAG_03003</b> | <b>Sfh1<sup>c</sup></b> | <b>35</b>                  |
| CNG02900        | CNAG_03285        | Rsc6 <sup>b</sup>       | 29                         |
| CNM00780        | CNAG_06068        | Rsc1 <sup>c</sup>       | 22                         |
| CNE02000        | CNAG_02350        | Rss1 <sup>b</sup>       | 22                         |
| CNB00580        | CNAG_06744        | Rsc9 <sup>c</sup>       | 18                         |
| CNB05320        | CNAG_04048        | Arp4 <sup>b</sup>       | 15                         |
| CNI00980        | CNAG_04460        | Arp9 <sup>b</sup>       | 12                         |

<sup>b</sup>: the SWI/SNF and RSC complex shared subunits; <sup>c</sup>: the RSC-specific subunits.

Supplementary Table 3. Related to Fig. 3. The Snf5 domain search in fungi.

| Kingdom                | class                          | species                               | strain                  | # |
|------------------------|--------------------------------|---------------------------------------|-------------------------|---|
| <b>Fungi</b>           | <i>Agaricomycetes</i>          | <i>Coprinopsis cinerea</i>            | okayama7#130            | 2 |
|                        |                                | <i>Phanerochaete chrysosporium</i>    | RP-78                   | 2 |
|                        | <i>Blastocladiomycetes</i>     | <i>Allomyces macrogynus</i>           | ATCC 38327              | 4 |
|                        | <i>Chytridiomycetes</i>        | <i>Batrachochytrium dendrobatidis</i> | JEL423                  | 3 |
|                        |                                | <i>Spizellomyces punctatus</i>        | DAOM BR117              | 2 |
|                        | <i>Dothideomycetes</i>         | <i>Zymoseptoria tritici</i>           | IPO323                  | 2 |
|                        | <i>Eurotiomycetes</i>          | <i>Aspergillus aculeatus</i>          | ATCC 16872              | 2 |
|                        |                                | <i>Aspergillus brasiliensis</i>       | CBS 101740              | 2 |
|                        |                                | <i>Aspergillus campestris</i>         | IBT 28561               | 2 |
|                        |                                | <i>Aspergillus carbonarius</i>        | ITEM 5010               | 3 |
|                        |                                | <i>Aspergillus clavatus</i>           | NRRL 1                  | 2 |
|                        |                                | <i>Aspergillus fischeri</i>           | NRRL 181                | 2 |
|                        |                                | <i>Aspergillus flavus</i>             | NRRL3357                | 2 |
|                        |                                | <i>Aspergillus fumigatus</i>          | A1163                   | 2 |
|                        |                                |                                       | Af293                   | 2 |
|                        |                                | <i>Aspergillus glaucus</i>            | CBS 516.65              | 2 |
|                        |                                | <i>Aspergillus kawachii</i>           | IFO 4308                | 2 |
|                        |                                | <i>Aspergillus luchuensis</i>         | CBS 106.47              | 2 |
|                        |                                | <i>Aspergillus nidulans</i>           | FGSC A4                 | 2 |
|                        |                                | <i>Aspergillus niger</i>              | ATCC 1015               | 2 |
|                        |                                |                                       | CBS 513.88              | 2 |
|                        |                                |                                       | strain N402 (ATCC64974) | 2 |
|                        |                                | <i>Aspergillus novofumigatus</i>      | IBT 16806               | 2 |
|                        |                                | <i>Aspergillus ochraceoroseus</i>     | IBT 24754               | 2 |
|                        |                                | <i>Aspergillus oryzae</i>             | RIB40                   | 1 |
|                        |                                | <i>Aspergillus stevni</i>             | IBT 23096               | 2 |
|                        |                                | <i>Aspergillus sydowii</i>            | CBS 593.65              | 2 |
|                        |                                | <i>Aspergillus terreus</i>            | NIH2624                 | 2 |
|                        |                                | <i>Aspergillus tubingensis</i>        | CBS 134.48              | 2 |
|                        |                                | <i>Aspergillus versicolor</i>         | CBS 583.65              | 2 |
|                        |                                | <i>Aspergillus wentii</i>             | DTO 134E9               | 2 |
|                        |                                | <i>Aspergillus zonatus</i>            | CBS 506.65              | 2 |
|                        |                                | <i>Coccidioides immitis</i>           | H538.4                  | 2 |
|                        |                                |                                       | RS                      | 2 |
|                        |                                | <i>Coccidioides posadasii</i>         | C735 delta SOWgp        | 2 |
|                        |                                |                                       | RMSCC 3488              | 2 |
|                        |                                |                                       | str. Silveira           | 2 |
|                        |                                | <i>Histoplasma capsulatum</i>         | G186AR                  | 2 |
|                        |                                |                                       | G217B                   | 2 |
|                        |                                |                                       | H143                    | 2 |
|                        |                                |                                       | H88                     | 2 |
|                        |                                |                                       | NAm1                    | 2 |
|                        |                                | <i>Paracoccidioides brasiliensis</i>  | Pb03                    | 2 |
|                        | Pb18                           |                                       | 2                       |   |
|                        | <i>Paracoccidioides lutzii</i> | Pb01                                  | 2                       |   |
|                        | <i>Penicillium rubens</i>      | Wisconsin 54-1255                     | 2                       |   |
|                        | <i>Talaromyces marneffe</i>    | ATCC 18224                            | 2                       |   |
|                        | <i>Talaromyces stipitatus</i>  | ATCC 10500                            | 2                       |   |
|                        | <i>Uncinocarpus reesii</i>     | 1704                                  | 2                       |   |
|                        | <i>Leotiomyces</i>             | <i>Botrytis cinerea</i>               | B05.10                  | 2 |
|                        |                                | <i>Sclerotinia sclerotiorum</i>       | 1980 UF-70              | 2 |
|                        | <i>Pneumocystidomycetes</i>    | <i>Pneumocystis jirovecii</i>         | SE8                     | 2 |
| <i>Pucciniomycetes</i> | <i>Melampsora larici</i>       |                                       | 2                       |   |
|                        | <i>Puccinia graminis</i>       | f. sp. tritici CRL 75-36-             | 2                       |   |
| <i>Saccharomycetes</i> | <i>Candida albicans</i>        | SC5314_B                              | 2                       |   |
|                        |                                | SC5314                                | 2                       |   |

|                              |                                       |                              |   |   |
|------------------------------|---------------------------------------|------------------------------|---|---|
|                              |                                       | WO-1                         | 2 |   |
|                              | <i>Candida auris</i>                  | strain B8441                 | 2 |   |
|                              | <i>Candida glabrata</i>               | CBS 138                      | 3 |   |
|                              | <i>Candida parapsilosis</i>           | CDC317                       | 2 |   |
|                              | <i>Clavispora lusitaniae</i>          | ATCC 42720                   | 2 |   |
|                              | <i>Saccharomyces cerevisiae</i>       | S288c                        | 2 |   |
|                              | Yarrowia lipolytica                   | CLIB122                      | 2 |   |
|                              |                                       | CLIB89 (W29)                 | 2 |   |
| <i>Schizosaccharomycetes</i> | <i>Schizosaccharomyces japonicus</i>  | yFS275                       | 2 |   |
|                              | <i>Schizosaccharomyces octosporus</i> | yFS286                       | 2 |   |
|                              | <i>Schizosaccharomyces pombe</i>      | 972h-                        | 2 |   |
| <i>Sordariomycetes</i>       | <i>Fusarium fujikuroi</i>             | IMI 58289                    | 2 |   |
|                              | <i>Fusarium graminearum</i>           | PH-1                         | 2 |   |
|                              | <i>Fusarium oxysporum</i>             | f. sp. melonis 26406         |   | 2 |
|                              |                                       | f. sp. lycopersici 4287      |   | 2 |
|                              |                                       | f. sp. cubense tropical race |   | 2 |
|                              |                                       | Fo47                         |   | 2 |
|                              |                                       | f. sp. cubense race 1        |   | 2 |
|                              | f. sp. cubense race 4                 |                              | 2 |   |
|                              | <i>Fusarium proliferatum</i>          | ET1                          | 2 |   |
|                              | <i>Fusarium verticillioides</i>       | 7600                         | 2 |   |
|                              | <i>Lomentospora prolificans</i>       | JHH-5317                     | 2 |   |
|                              | <i>Magnaporthe oryzae</i>             | 70-15                        |   | 2 |
|                              |                                       | BR32                         |   | 2 |
|                              | <i>Neurospora crassa</i>              | OR74A                        | 2 |   |
|                              | <i>Neurospora discreta</i>            | FGSC 8579                    | 2 |   |
|                              | <i>Neurospora tetrasperma</i>         | FGSC 2508                    | 2 |   |
|                              | <i>Scedosporium apiospermum</i>       | IHEM 14462                   | 2 |   |
|                              | <i>Sordaria macrospora</i>            | k-hell                       | 2 |   |
|                              | <i>Sporothrix brasiliensis</i>        | 5110                         | 2 |   |
|                              | <i>Sporothrix schenckii</i>           | 1099-18                      | 2 |   |
| <i>Trichoderma reesei</i>    | QM6a                                  | 2                            |   |   |
| <i>Tremellomycetes</i>       | <i>Cryptococcus deutero-gattii</i>    | R265                         | 2 |   |
|                              | <i>Cryptococcus gattii</i>            | CA1873                       |   | 2 |
|                              |                                       | EJB2                         |   | 2 |
|                              |                                       | VGIV IND107                  |   | 2 |
|                              |                                       | NT-10                        |   | 2 |
|                              |                                       | WM276                        |   | 2 |
|                              | <i>Cryptococcus neoformans</i>        | var. neoformans B-3501A      |   | 2 |
|                              |                                       | var. grubii H99              |   | 2 |
|                              |                                       | var. neoformans JEC21        |   | 2 |
|                              |                                       | var. grubii KN99             |   | 2 |
| <i>Tremella mesenterica</i>  | DSM 1558                              | 2                            |   |   |
| <i>Ustilaginomycetes</i>     | <i>Malassezia globosa</i>             | CBS 7966                     | 2 |   |
|                              | <i>Sporisorium reilianum</i>          | SRZ2                         | 2 |   |
|                              | <i>Ustilago maydis</i>                | 521                          | 2 |   |
| <i>Zygomycetes</i>           | <i>Mucor circinelloides</i>           | f. lusitanicus CBS 277.49    | 3 |   |
|                              | <i>Phycomyces blakesleeanus</i>       | NRRL 1555(-)                 | 3 |   |
|                              | <i>Rhizopus delemar</i>               | RA 99-880                    | 1 |   |

**Supplementary Table 4.** The list of Snf2 proteins identified in selected fungi by RBOMO and BSA domains search in FungiDB.

| Phylum                   | Species                          | Gene locus                                                    | Product description                                                                    | Strain background                                  |
|--------------------------|----------------------------------|---------------------------------------------------------------|----------------------------------------------------------------------------------------|----------------------------------------------------|
| Basidiomycota            | <i>Coprinospis cinerea</i>       | CC1G_08634                                                    | Snf2-family ATP dependent chromatin remodeling factor snf21                            | <i>C. cinerea okayama7#130</i>                     |
|                          | <i>Puccinia graminis</i>         | PGTG_08738                                                    | Snf2-family ATP-dependent chromatin remodeling factor                                  | <i>P. graminis f. sp. tritici CRL 75-36-700-3</i>  |
|                          | <i>Cryptococcus neoformans</i>   | CNK02030                                                      | Snf2 family, chromatin remodeling factor Snf2                                          | <i>C. neoformans var. neoformans JEC21</i>         |
|                          | <i>Ustilago maydis</i>           | UMAG_11301                                                    | putative SWI/SNF catalytic subunit                                                     | <i>U. maydis 521</i>                               |
| Ascomycota               | <i>Schizosaccharomyces pombe</i> | SPAC1250.01                                                   | RSC complex ATP-dependent DNA helicase <b>Snf21</b>                                    | <i>S. pombe 972h-</i>                              |
|                          |                                  | SPCC1620.14c                                                  | SWI/SNF ATP-dependent DNA helicase <b>Snf22</b>                                        | <i>S. pombe 972h-</i>                              |
|                          | <i>Saccharomyces cerevisiae</i>  | YIL126W                                                       | RSC chromatin remodeling complex ATPase subunit <b>Sth1</b>                            | <i>S. cerevisiae S288c</i>                         |
|                          |                                  | YOR290C                                                       | SWI/SNF catalytic subunit <b>Snf2</b>                                                  | <i>S. cerevisiae S288c</i>                         |
|                          | <i>Candida albicans</i>          | C2_02100W_A                                                   | Protein involved in transcriptional regulation; ortholog of <i>S. cerevisiae</i> Snf2p | <i>C. albicans SC5314</i>                          |
|                          |                                  | C3_02490C_A                                                   | Putative ATP-dependent helicase; induced by nitric oxide                               | <i>C. albicans SC5314</i>                          |
|                          | <i>Candida glabrata</i>          | CAGL0G08756g                                                  | Ortholog(s) have DNA translocase activity, helicase activity, <b>Sth1</b>              | <i>C. glabrata CBS 138</i>                         |
|                          |                                  | CAGL0M04807g                                                  | Catalytic subunit of the chromatin remodelling Swi/Snf complex, <b>Snf2</b>            | <i>C. glabrata CBS 138</i>                         |
|                          | <i>Aspergillus nidulans</i>      | AN2278                                                        | SNF2 family, chromatin remodeling factor                                               | <i>A. nidulans FGSC A4</i>                         |
|                          | <i>Fusarium oxysporum</i>        | FOZG_05129                                                    | SNF2-family ATP-dependent chromatin remodeling factor                                  | <i>F. oxysporum Fo47</i>                           |
|                          | <i>Sclerotinia sclerotiorum</i>  | SS1G_07017                                                    | SNF2-family ATP dependent chromatin remodeling factor                                  | <i>S. sclerotiorum 1980 UF-70</i>                  |
| <i>Neurospora crassa</i> | NCU06488                         | SNF2-family ATP dependent chromatin remodeling factor, crf3-1 | <i>N. crassa OR74A</i>                                                                 |                                                    |
| Zygomycota               | <i>Rhizopus delemar</i>          | RO3G_14502                                                    | SNF2-family ATP dependent chromatin remodeling factor                                  | <i>R. delemar RA 99-880</i>                        |
|                          | <i>Phycomyces blakesleeanus</i>  | PHYBL_96129                                                   | Chromatin remodeling complex SWI/SNF, component SWI2 and related ATPases               | <i>P. blakesleeanus NRRL 1555(-)</i>               |
|                          | <i>Mucor circinelloides</i>      | QYA_31459                                                     | Chromatin remodeling complex SWI/SNF, component SWI2 and related ATPases               | <i>M. circinelloides f. lusitanicus CBS 277.49</i> |
| QYA_136222               |                                  | SNF2-family ATP dependent chromatin remodeling factor         | <i>M. circinelloides f. lusitanicus CBS 277.49</i>                                     |                                                    |

**Supplementary Table 5.** The strains used in this study.

| Strain Name    | Genotype                                                                                        | Sources                                      |
|----------------|-------------------------------------------------------------------------------------------------|----------------------------------------------|
| H99 $\alpha$   | wild type                                                                                       | 1                                            |
| KN99a          | wild type                                                                                       | 1                                            |
| XL280 $\alpha$ | wild type                                                                                       | 2, ATAC-seq, RNA-seq                         |
| XL280a         | wild type                                                                                       | 3                                            |
| JEC21 $\alpha$ | wild type                                                                                       | 4                                            |
| JEC20a         | wild type                                                                                       | 4                                            |
| XX17           | XL280 $\alpha$ , <i>znf2</i> ::NAT, P <sub>CTR4-2</sub> -mCherry-ZNF2-NEO                       | 5, Insertional mutagenesis                   |
| XL574          | XL280 $\alpha$ , <i>znf2</i> ::NAT                                                              | 6, ATAC-seq, RNA-seq                         |
| XT110          | XL280a, <i>znf2</i> ::NAT                                                                       | 7                                            |
| XL942          | XL280 $\alpha$ , <i>mat2</i> ::NAT                                                              | 6                                            |
| XL1319         | XL280 $\alpha$ , <i>prf1</i> ::NAT                                                              | 6                                            |
| YM61           | XL280 $\alpha$ , <i>rum1a</i> ( <i>phd13</i> )::NAT                                             | 8                                            |
| YSB133         | KN99a, <i>can1</i> ::NEO                                                                        | 9                                            |
| LW377          | XL280 $\alpha$ , P <sub>GPD1</sub> -ZNF2-V5 -NEO                                                |                                              |
| JL131          | H99 $\alpha$ , <i>brf1</i> (cnag_00240)::NAT                                                    | This study                                   |
| JL233          | XL280 $\alpha$ , <i>brf1</i> (cna02310)::NAT                                                    | This study, ATAC-seq, RNA-seq                |
| JL249          | XL280a, <i>brf1</i> ::NAT                                                                       | This study                                   |
| JL251          | XL280 $\alpha$ , <i>brf1</i> ::NAT                                                              | This study                                   |
| JL292          | XL280 $\alpha$ , <i>ssn6</i> (cnk02410)::NAT                                                    | This study                                   |
| JL302          | XL280 $\alpha$ , <i>brf1</i> ::NAT, P <sub>TEF1</sub> -BRF1-tdTomato-NEO                        | This study                                   |
| JL401          | H99 $\alpha$ , <i>brf1</i> ::NAT, P <sub>TEF1</sub> -BRF1-CBP-2xFLAG-NEO                        | This study, Co-IP/MS                         |
| JL402          | H99 $\alpha$ , <i>brf1</i> ::NAT, P <sub>TEF1</sub> -BRF1-CBP-2xFLAG-NEO                        | This study, Co-IP/MS                         |
| JL439          | XL280a, <i>snf2</i> (cnk02030)::NAT                                                             | This study                                   |
| JL440          | XL280 $\alpha$ , <i>snf2</i> ::NAT                                                              | This study                                   |
| JL444          | XL280a, <i>snf5</i> (cna07190)::NAT                                                             | This study                                   |
| JL445          | XL280 $\alpha$ , <i>snf5</i> ::NAT                                                              | This study, ATAC-seq                         |
| JL486          | XL280 $\alpha$ , <i>sfh1</i> (cnc06140)::NAT                                                    | This study                                   |
| JL552          | XL280 $\alpha$ , <i>rsc9</i> (cnb00580)::NAT                                                    | This study                                   |
| JL555          | XL280 $\alpha$ , <i>avc1</i> (cnk00710)::NAT                                                    | This study                                   |
| JL576          | XL280 $\alpha$ , <i>snf5</i> ::NAT, <i>sfh1</i> ::NAT                                           | This study                                   |
| JL586          | XL280 $\alpha$ , <i>brf1</i> ::NAT, P <sub>TEF1</sub> -BRF1-CBP-2xFLAG-NEO                      | This study, ATAC-seq, RNA-seq, Co-IP/western |
| JL589          | XL280 $\alpha$ , <i>sfh1</i> ::NAT, P <sub>GPD1</sub> -SFH1-mNeonGreen-NEO                      | This study, Co-IP/MS                         |
| JL596          | XL280 $\alpha$ , <i>brf1</i> ::NAT, <i>snf5</i> ::NEO                                           | This study                                   |
| JL650          | XL280a, <i>znf2</i> ::NAT, P <sub>CTR4-2</sub> -3xFLAG-ZNF2-NEO                                 | This study                                   |
| JL653          | XL280 $\alpha$ , P <sub>CTR4-2</sub> -3xFLAG-ZNF2-NEO                                           | This study, ChIP-qPCR, ChIP-seq              |
| JL655          | XL280a, P <sub>CTR4-2</sub> -3xFLAG-ZNF2-NEO                                                    | This study                                   |
| JL665          | XL280 $\alpha$ , <i>brf1</i> ::NAT, P <sub>CTR4-2</sub> -3xFLAG-ZNF2-NEO                        | This study, ChIP-qPCR, ChIP-seq              |
| JL715          | XL280 $\alpha$ , <i>snf5</i> ::NAT, P <sub>GPD1</sub> -SNF5-mNeonGreen-NEO,                     | Co-IP/western                                |
| JL852          | XL280 $\alpha$ , P <sub>GPD1</sub> -SNF5-mNeonGreen-NEO, P <sub>TEF1</sub> -BRF1-CBP-2xFLAG-NAT | Co-IP/western                                |
| JL853          | XL280 $\alpha$ , P <sub>GPD1</sub> -SNF5-mNeonGreen-NEO, P <sub>TEF1</sub> -BRF1-CBP-2xFLAG-NAT | Co-IP/western                                |

**Supplementary Table 6.** The vectors used in this study.

| <b>Vector Name</b>    | <b>Genotype</b>                                                       | <b>Backbone</b> | <b>Sources</b> |
|-----------------------|-----------------------------------------------------------------------|-----------------|----------------|
| pXL1                  | P <sub>GPD1</sub> -Fse1-Pac1-T <sub>GPD1</sub> -NEO                   | Topo2.1         |                |
| pXC                   | P <sub>CTR4-2</sub> -Fse1-Pac1-T <sub>GPD1</sub> -NEO                 | pXL1            |                |
| pYF5                  | P <sub>GPD1</sub> - <i>PHD11</i> -mNeonGreen- T <sub>GPD1</sub> -NEO  | pUC19           | This Study     |
| pFZ3- <i>ZNF2</i> (D) | P <sub>CTR4-2</sub> -3X FLAG- <i>ZNF2</i> (D)- T <sub>GPD1</sub> -NEO | pUC19           | This Study     |
| pJL1                  | P <sub>TEF1</sub> -Fse1-AsiS1-CBP-2X FLAG- T <sub>GPD1</sub> -NEO     | pXC             | This Study     |
| pJL2                  | P <sub>TEF1</sub> - <i>BRF1</i> -CBP-2X FLAG- T <sub>GPD1</sub> -NEO  | pXL1            | This Study     |
| pJL3                  | P <sub>TEF1</sub> - <i>BRF1</i> -tdTomato- T <sub>GPD1</sub> -NEO     | pXL1            | This Study     |
| pJL4                  | P <sub>GPD1</sub> - <i>SFH1</i> -mNeonGreen- T <sub>GPD1</sub> -NEO   | pUC19           | This Study     |
| pJL5                  | P <sub>GPD1</sub> - <i>SNF5</i> -mNeonGreen- T <sub>GPD1</sub> -NEO   | pUC19           | This Study     |

**Supplementary Table 7.** The primers used in this study.

| Primer sequence                                 | Annotation               | Locus |
|-------------------------------------------------|--------------------------|-------|
| GTAAAACGACGGCCAG                                | M13F                     |       |
| CAGGAAACAGCTATGAC                               | M13R                     |       |
| TGTGGATGCTGGCGGAGGATA                           | <i>PACT1</i> -R          |       |
| AGGAGCATGATCCGATAC                              | <i>GPD1</i> terminator R |       |
| TGCTTCTGTATTTGGGTTCTG                           | <i>PCTR4-2</i> F         |       |
| GGCTCAAAGAGCAGATCAATG                           | U6 promoter Far-LF       | U6    |
| CCATCGATTTGCATTAGAACTAAAAACAAAGCA               | U6 promoter F            | U6    |
| CCTCTGACACATGCAGCTCC                            | gRNA outside R           |       |
| CCGCTCGAGTAAAACAAAAAAGCACCGAC                   | gRNA-R                   |       |
| TGATCTGGCCGGCCaaaaATGGACAAAAAATACAGC            | FseI-Cas9 ORF F          |       |
| CTTGAAGTAGTCCTCCTTGAG                           | Cas9 screening R         |       |
| CCATAATGGACTTCCACCG                             | Far Left F               | ZNF2  |
| GGACAATCAGCTACCATCCA                            | LF                       | SNF5  |
| ctggccgctgttttacCTATAGGCGGACGTACAGTC            | M13Fc+LR                 | SNF5  |
| gcatagctgtttcctgTCCACTGGTTCAACTGCAT             | M13Rc+RF                 | SNF5  |
| TATCATATGTGCAGTCATCTCAT                         | RR                       | SNF5  |
| CTCCTGGTCGGCAGAGAT                              | Far Left F               | SNF5  |
| TGCTGAGTCTCATGCTATCTT                           | NEST R                   | SNF5  |
| ATAACCACCAGTACGTCTCGG                           | Screen F                 | SNF5  |
| AATATCAGATATGCGCTCACAA                          | Screen R                 | SNF5  |
| TAATCTATAGCGTTCCGCCGAACAGTATACCCCTGCCGGTG       | gRNAC(snf5)-U6R          | SNF5  |
| GCGGCGAACGCTATAGATTAGTTTATAGAGCTAGAAATAGCAAGTT  | gRNA(snf5)-ScaffoldF     | SNF5  |
| ATAgccggccATGAACAACCAAAACCAGCA                  | FseI+F                   | BRF1  |
| ATAgcgatgcTATCGAATCACCACCCAG                    | AsiSI+prestopR           | BRF1  |
| CGGACTGCTTGAGAGCGA                              | LF                       | BRF1  |
| ctggccgctgttttacCAGAGTGCGACTAATGCGT             | M13Fc+LR                 | BRF1  |
| gcatagctgtttcctgATCTGGGATGGGATTCGG              | M13Rc+RF                 | BRF1  |
| GCTTCTTGATATTGGCGACA                            | RR                       | BRF1  |
| GTGCGATCTGAACTGCGG                              | Far Left F               | BRF1  |
| CAGCCGGCAGCAACAAC                               | NEST R                   | BRF1  |
| GCTTGAGGATGCCCCG                                | NEST F                   | BRF1  |
| GGTACTGGACAGGATCGGT                             | ORF-F                    | BRF1  |
| CCTGCGGAACCAACCAA                               | Screen F/ ORF-mid-F      | BRF1  |
| TTATATCGAATCACCACCC                             | Screen R                 | BRF1  |
| TCAGCAGATCAATGACGTCCAACAGTATACCCCTGCCGGTG       | gRNAC(brf1)-U6R          | BRF1  |
| GGACGTCAATTGATCTGCTGAGTTTATAGAGCTAGAAATAGCAAGTT | gRNA(brf1)-ScaffoldF     | BRF1  |
| ACGCTAACACTCAGGGTTGT                            | LF                       | SNF2  |
| ctggccgctgttttacCCAATTATCCGTCGTTCTTG            | M13Fc+LR                 | SNF2  |
| gcatagctgtttcctgCTACGATACGTGACACCACAC           | M13Rc+RF                 | SNF2  |
| TGTA ACTCTGGAGTCGGACTT                          | RR                       | SNF2  |
| GAGTGAAGATCATCAGCCGT                            | Far Left F               | SNF2  |
| CGTCAGATGGTTACTCATTG                            | NEST R                   | SNF2  |
| CCGCATAGTAATCCACCTTG                            | ORF-R                    | SNF2  |
| GGTGTGAAGAGACGCCAG                              | LF                       | SFH1  |
| ctggccgctgttttacTTGTCGATTACCCTGATTACG           | M13Fc+LR                 | SFH1  |
| gcatagctgtttcctgCCAAGTTAGCTTCTGATCATTG          | M13Rc+RF                 | SFH1  |
| CAGGAGATTTGCGAGTGTAGTC                          | RR                       | SFH1  |
| CTGTGAATGGTGACGAGCC                             | Far Left F               | SFH1  |
| GCTACATAACACGAATCACTCAG                         | NEST R                   | SFH1  |
| CAGGCAGTGAACGAGC                                | ORF F                    | SFH1  |
| CAAGAGTTCTTCGGTGATGG                            | ORF R                    | SFH1  |
| ATAgccggccCTCCCGTCTACGAAATGG                    | FseI+F                   | SFH1  |
| ATTAgcgatgcCCTTCTTCTTCAAAGGC                    | AsiSI+prestopR           | SFH1  |
| CAACTGACTTGCTCTTTAGT                            | LF                       | RSC9  |
| ctggccgctgttttacCAAGAAGGGAAGAATGTGTG            | M13Fc+LR                 | RSC9  |
| gcatagctgtttcctgGACATGTCTCAATTGGGTG             | M13Rc+RF                 | RSC9  |



|                                               |                      |      |
|-----------------------------------------------|----------------------|------|
| GAGAATGAGCGGATCGG                             | RR                   | RSC9 |
| CGGGAAGATATCTCAGCC                            | Far Left F           | RSC9 |
| GGCTACTACAGACACTCGTC                          | NEST R               | RSC9 |
| CCTCATCATTGTCCAGTCC                           | ORF F                | RSC9 |
| GATGGTAGTTGCTAATGTGTTC                        | ORF R                | RSC9 |
| ACTCTGCTTTCTACAGCCCAAACAGTATACCCTGCCGGTG      | gRNAc(rsc9)-U6R      | RSC9 |
| TGGGCTGTAGAAAGCAGAGTGTTTTAGAGCTAGAAATAGCAAGTT | gRNA(rsc9)-ScaffoldF | RSC9 |
| TGTAAGTGAGCAGATTGTCTG                         | LF                   | AVC1 |
| ctggccgctgttttacTATGTGGTGGCGTTCAATC           | M13Fc+LR             | AVC1 |
| gcatagctgtttctcgGAGGGCTTTGGCTAGCG             | M13Rc+RF             | AVC1 |
| GTGGTCTATCACAGTTCGTG                          | RR                   | AVC1 |
| TCGGTGGAGCGGAAGTG                             | Far Left F           | AVC1 |
| GATGGAAGCCACCTCTGTG                           | NEST R               | AVC1 |
| CTACAGATGGAGCACAGCC                           | ORF F                | AVC1 |
| CATCGCAAGTACCTACCATG                          | ORF R                | AVC1 |
| TGTAAGTCCACGAGGTCATCAACAGTATACCCTGCCGGTG      | gRNAc(ave1)-U6R      | AVC1 |
| GATGACCTCGTGGACTTACAGTTTTAGAGCTAGAAATAGCAAGTT | gRNA(ave1)-ScaffoldF | AVC1 |
| GTGCTCGCACATCAGATGC                           | LF                   | SSN6 |
| ctggccgctgttttacTGCTTCCAGCGTCATCG             | M13Fc+LR             | SSN6 |
| gcatagctgtttctcgAGGATGGACGAATGTGAGG           | M13Rc+RF             | SSN6 |
| CTTGGCTGCTTACGATACG                           | RR                   | SSN6 |
| TATTCCGTATTCCGTCATGA                          | Far Left F           | SSN6 |
| CGACGGAATATGCAATGCT                           | NEST R               | SSN6 |
| AATTGACGTTACCCATCTC                           | Screen F/ ORF F      | SSN6 |
| GGAGTTGATGTCTGAGCAGTAC                        | Screen R/ ORF R      | SSN6 |
| AGTATCTTTATCCGACGCCCAAACAGTATACCCTGCCGGTG     | gRNA(ssn6)-U6R       | SSN6 |
| GGGCGTCGGATAAAGATACTGTTTTAGAGCTAGAAATAGCAAGTT | gRNA(ssn6)-ScaffoldF | SSN6 |
|                                               |                      |      |
| GCCCGAAGAAGCGGAATACA                          | 1F                   | ZNF2 |
| CTTTGGGCAATGTGCCTGAC                          | 1R                   | ZNF2 |
| ATTATGCCTGCTGCTCTGCT                          | 2F                   | ZNF2 |
| CCGGTCTCAAAGTACCGGAT                          | 2R                   | ZNF2 |
| CATGCTTGTGGCGTTCAGTT                          | 3F                   | ZNF2 |
| GTGTAGCTTGCAACTTCCGT                          | 3R                   | ZNF2 |
| CCGGTACTTTGAGACCGGAT                          | 4F                   | ZNF2 |
| TGCCTGCCACATCATTGAGA                          | 4R                   | ZNF2 |
| ACACTACTACTGTGGGCAGG                          | 5F                   | ZNF2 |
| CGTGCCAGCACTTCTCTTCT                          | 5R                   | ZNF2 |
| GGCTTGCATATGTCCGCAAT                          | 6F                   | ZNF2 |
| AACGCGTTATCTGGGTGCTT                          | 6R                   | ZNF2 |
| GAACCCAACGATGGAGACGG                          | 7F                   | ZNF2 |
| TAAGGTGAACACGAAGCGCC                          | 7R                   | ZNF2 |
| GCGCTTCGTGTTACCTTAC                           | 8F                   | ZNF2 |
| CAGAGGACGATCAAGGGCTC                          | 8R                   | ZNF2 |
| TGGACATAGGAACGCTGACAAT                        | 9F                   | ZNF2 |
| GAACCTCGTTATGAGGCTTCTC                        | 9R                   | ZNF2 |
| GGCGGTTGCTTCTTTTGAT                           | 1F                   | CFL1 |
| TCAGCTGTTGCTGTCTGTC                           | 1R                   | CFL1 |
| GCATGGCTAGGGGTCAAAGT                          | 2F                   | CFL1 |
| ACAACAACGGTGATGGCTCT                          | 2R                   | CFL1 |
| TCAAGCTTCGTTTCAGCAGC                          | 3F                   | CFL1 |
| AATCTCCGGACGCAGGATTC                          | 3R                   | CFL1 |
| GCTGTCCATTGTCCATGAGC                          | 4F                   | CFL1 |
| TCACCCTACGGTTCCTGTCT                          | 4R                   | CFL1 |
| GCGTCCGGAGATTCTCATGT                          | 5F                   | CFL1 |
| ACCTCTTTGGGACGCGTATG                          | 5R                   | CFL1 |
| GATGCATACGCGTCCCAAAG                          | 6F                   | CFL1 |
| GGCGTGTGTGATTGTGAGG                           | 6R                   | CFL1 |
| CCGAGCGCAAAGATGGATGA                          | 7F                   | CFL1 |

|                       |    |      |
|-----------------------|----|------|
| TGTCCCGAGGATCTGATGGT  | 7R | CFL1 |
| AGCTGCCTTGTCTTGCTTTCG | 8F | CFL1 |
| CCTAATAGCGCACTGGCAACC | 8R | CFL1 |
| CTCCACTCTCGTGCTCCTGAA | 9F | CFL1 |
| CCAGATTTGCAGCTGTAGAC  | 9R | CFL1 |

- 1 Nielsen, K. *et al.* Sexual cycle of *Cryptococcus neoformans* var. *grubii* and virulence of congenic  $\alpha$  and  $\alpha$  isolates. *Infection and immunity* **71**, 4831-4841 (2003).
- 2 Lin, X. R., Hull, C. M. & Heitman, J. Sexual reproduction between partners of the same mating type in *Cryptococcus neoformans*. *Nature* **434**, 1017-1021, doi:10.1038/nature03448 (2005).
- 3 Zhai, B. *et al.* Congenic strains of the filamentous form of *Cryptococcus neoformans* for studies of fungal morphogenesis and virulence. *Infection and immunity* **81**, 2626-2637, doi:10.1128/IAI.00259-13 (2013).
- 4 Kwon-Chung, K. J., Edman, J. C. & Wickes, B. L. Genetic association of mating types and virulence in *Cryptococcus neoformans*. *Infection and immunity* **60**, 602-605 (1992).
- 5 Wang, L., Zhai, B. & Lin, X. The link between morphotype transition and virulence in *Cryptococcus neoformans*. *PLoS pathogens* **8**, e1002765, doi:10.1371/journal.ppat.1002765 (2012).
- 6 Lin, X., Jackson, J. C., Feretzaki, M., Xue, C. & Heitman, J. Transcription factors Mat2 and Znf2 operate cellular circuits orchestrating opposite- and same-sex mating in *Cryptococcus neoformans*. *PLoS genetics* **6**, e1000953, doi:10.1371/journal.pgen.1000953 (2010).
- 7 Wang, L., Tian, X., Gyawali, R. & Lin, X. Fungal adhesion protein guides community behaviors and autoinduction in a paracrine manner. *Proceedings of the National Academy of Sciences of the United States of America* **110**, 11571-11576, doi:10.1073/pnas.1308173110 (2013).
- 8 Meng, Y. F., Fan, Y. M., Liao, W. Q. & Lin, X. R. Plant Homeodomain Genes Play Important Roles in Cryptococcal Yeast-Hypha Transition. *Applied and Environmental Microbiology* **84**, doi:UNSP e01732-1710.1128/AEM.01732-17 (2018).
- 9 Bahn, Y. S., Cox, G. M., Perfect, J. R. & Heitman, J. Carbonic anhydrase and CO<sub>2</sub> sensing during *Cryptococcus neoformans* growth, differentiation, and virulence. *Curr Biol* **15**, 2013-2020, doi:10.1016/j.cub.2005.09.047 (2005).
